1 **Thyroid hormone levels associate with insulin resistance in obese women with**  
2 **metabolic syndrome in Saudi Arabia: A cross-sectional study**

3 Manal Abdulaziz Binobead<sup>1</sup>, Nawal Abdullah Al Badr<sup>1</sup>, Wahidah Hazzaa Al-Qahtani<sup>1</sup>, Sahar  
4 Abdulaziz AlSedairy<sup>1</sup>, Tarfa Ibrahim Albrahim<sup>2</sup>, Maha Hussain Alhussain<sup>1</sup>, Tahani Ali  
5 Aljurbua<sup>1</sup>, Shaista Arzoo<sup>1</sup>, Wedad Saeed Al-Qahtani<sup>3</sup>

6

7 <sup>1</sup> *College of Food Science & Agriculture, Department of Food Science & Nutrition, King Saud University, Riyadh,*  
8 *Saudi Arabia.*

9 <sup>2</sup> *Department of Health Sciences, College of Health and Rehabilitation Sciences. Princess Nourah bint Abdulrahman*  
10 *University*

11 <sup>3</sup> *Naif Arab University for Security Sciences, Saudi Arabia*

12

13 **Corresponding Author;**

14 Wedad Saeed Al-Qahtani

15 *Naif Arab University for Security Sciences, Faculty of Forensic Sciences, Forensic Biology*  
16 *Department*

17 Email;

18 [walqahtani@nauss.edu.sa](mailto:walqahtani@nauss.edu.sa)

19 [dr.wedad.alqahtani@gmail.com](mailto:dr.wedad.alqahtani@gmail.com)

20

21 **Acknowledgements**

22 The authors extend their appreciation to the Deanship of Scientific Research at King Saud  
23 University for funding this work through the Research Project No R6-17-03-65.

24

25

## 26 **Abstract**

### 27 **Background**

28 The obesity epidemic is a pressing global health concern, as obesity rates continue to  
29 climb worldwide. The current study was aimed mainly to evaluate the correlation between  
30 thyroid hormones and homeostatic model assessment of insulin resistance in Saudi obese women  
31 with metabolic syndrome.

### 32 **Methods**

33 100 obese women aged 25 to 55 years were clinically evaluated, from which 72 women  
34 were diagnosed with the metabolic syndrome and 28 without metabolic syndrome. Insulin  
35 resistance was quantified using the homeostatic model assessment of insulin resistance method  
36 and the resulting values were analyzed for association with demographic, clinical, and metabolic  
37 parameters.

### 38 **Results**

39 This analysis revealed that body mass index, systolic blood pressure, and biochemical  
40 parameters and fasting insulin showed statistically higher levels in the group with metabolic  
41 syndrome compared to the group without metabolic syndrome. Similarly, values of waist  
42 circumference, fat ratio, cholesterol, free thyroxine, free triiodothyronine and homeostatic model  
43 assessment of insulin resistance results were higher in the group with metabolic syndrome as  
44 compared to the group without metabolic syndrome. Correlation analysis revealed positive  
45 association of thyroid-stimulating hormone with waist circumference ( $P=0.01$ ), total cholesterol  
46 ( $P=0.002$ ), fasting insulin ( $P=0.03$ ) and homeostatic model assessment of insulin resistance  
47 results ( $P<0.01$ ), and negatively associated with diastolic blood pressure ( $P=0.013$ ) and age  
48 ( $P=0.05$ ). Free thyroxine was positively associated with triglyceride level ( $P=0.003$ ) and  
49 negatively associated with homeostatic model assessment of insulin resistance values ( $P=0.035$ )  
50 and fasting insulin. Free triiodothyronine was positively associated with body mass index  
51 ( $P=0.032$ ) and waist circumference ( $P= 0.006$ ) and negatively with age ( $P=0.004$ ) and total  
52 cholesterol ( $P=0.001$ ).

53 Homeostatic model assessment of insulin resistance test revealed elevated level with  
54 positive association of body mass index, waist circumference, biochemical parameters and

55 thyroid-stimulating hormone in insulin resistant obese women. Higher level of free  
56 triiodothyronine was found to be associated with low insulin sensitivity.

57 **Keywords:** Metabolic syndrome, insulin resistance, diabetes, thyroid hormone, obesity

58

## 59 **Introduction**

60 The obesity and overweight are associated to the risk of health complications and  
61 premature death, obesity is the greatest contributing factor underlying the metabolic syndrome  
62 (MetS) (Danaei et al., 2014). MetS is a chronic medical condition manifested by a cluster of  
63 symptoms (e.g., low high-density lipoprotein cholesterol (HDL-C) levels, high blood pressure  
64 (BP), high triglyceride (TG) levels, insulin resistance (IR), and other anthropometric and  
65 biochemical factors) that are associated with developing cardiovascular disease and type 2  
66 diabetes mellitus (Ford et al., 2005). A precursor to type 2 diabetes. IR basically refers to the  
67 inability of insulin to perform its function at the optimum concentration required for its  
68 biological activity (Harris et al., 1998; Ferrannini, 2004). This causes responsible for this  
69 inability can range from defective glucose output in the liver to impaired insulin uptake in the  
70 muscle (Farasat et al., 2011).

71 Healthy thyroid activity is required to maintain the overall health of an individual.  
72 Several studies have described the effect of thyroid hormones on body mass index (BMI).  
73 Hypothyroidism leads to weight gain, while hyperthyroidism causes weight loss (Hoogwerf and  
74 Nutall, 1984). Moreover, it has also been established that obesity affects thyroid gland function  
75 (Topsakal et al., 2012). Previous studies have associated thyroid hormones with insulin activity,  
76 toward regulating the metabolism of glucose; the dysregulation of this pathway contributes to IR  
77 (Ravi and Gokaldas, 2015). Thyroid hormones regulated a variety of proteins involved in

78 maintaining insulin sensitivity (Klieverik et al., 2009). The loss of insulin sensitivity, IR, is  
79 associated with obesity and has been used as a predictor of developing cardiovascular disease  
80 and type 2 diabetes (Naslund et al., 2000). Multiple studies have evidenced the cooperative  
81 relationship between thyroid hormones and insulin in glucose metabolism (Lacobellis et al.,  
82 2005; Chakarabarti et al., 2007). Maintaining glucose homeostasis involves the complex  
83 interplay between physiological pathways that regulate insulin secretion and modulate its activity  
84 (Farasat et al., 2011). The American Association of Clinical Endocrinologists (AACE) has  
85 provided guidelines for the diagnosis of abnormal thyroid function and for the treatment of  
86 thyroid dysfunction in patients with abnormal serum levels of thyroid-stimulating hormone  
87 (TSH) (Gharib et al., 2004). The possible role of TSH in adipogenesis and IR has already been  
88 established (Bastemir et al., 2007). Among its various metabolic effectors, WC and BMI  
89 correlate positively with serum TSH levels (Knudsen et al., 2005); however, the relationship  
90 between IR and TSH remains largely unexplored, particularly in the Saudi, female population  
91 affected by MetS.

92 Therefore, the aim of this cross-sectional study is to identify associations between TSH,  
93 IR, and other clinically-relevant metrics in obese women with and without MetS in Saudi Arabia.  
94 The objectives of this study include: 1) to evaluate the anthropometric, clinical, and biochemical  
95 characteristics of the study subjects; 2) to analyze these characteristics for correlations with  
96 insulin sensitivity level; 3) to detect associations between TSH levels and the subjects' clinical  
97 and biochemical characteristics, MetS diagnosis, and insulin sensitivity level.

## 98 **Materials and Methods**

### 99 **Study subjects**

100 The analysis was carried out on 163 obese and overweight women aged 25 to 55 years.  
101 All of the patients had BMI  $\geq 25$  kg/m<sup>2</sup>. The presence of medical conditions was assessed

102 through self-report. A pre-structured and pre-tested questionnaire were used to gather  
103 demographic information and personal and family medical history. Informed consent was  
104 obtained from all participants.

#### 105 ***Inclusion criteria***

106 This study included women aged 25 to 55 years with BMIs over 25 kg/m<sup>2</sup> (Fig. 1).

#### 107 ***Exclusion criteria***

108 Subjects with a history of smoking, polycystic ovary syndrome, chronic renal failure,  
109 thyroid disease, chronic hepatopathy, or cancer as well as subjects taking antihypertensive drugs  
110 and statins, contraceptive drugs, hormone replacement therapy, any medications known to  
111 interfere with glucose and/or insulin secretion and/or metabolism were excluded from the study  
112 (Fig. 1).

#### 113 ***Demographic data***

114 A pre-structured and pre-tested questionnaire was used to gather self-reported  
115 demographic information and individual and familial medical history.

#### 116 ***Ethical considerations***

117 Informed consent was orally obtained from all participants before they gave voluntary  
118 consent for this study and approved by IRB.

#### 119 ***Anthropometric measurements***

120 Anthropometric measurements were carried out three times by a single tester.

#### 121 ***Height and weight***

122 Height was measured without shoes and using a stadiometer. Body weight was morning  
123 determined in lightweight clothing, with a digital scale.

#### 124 ***Body mass index (BMI)***

125 BMI was calculated as the weight (kilograms) divided by the square of height (meters).

126 ***Waist circumference (WC)***

127 Subject's WC was measured using a flexible measuring tape, midway between the  
128 xiphoid and the umbilicus during the mid-inspiratory phase.

129 ***Blood pressure (BP)***

130 Two BP measurements were taken with the subject in the seated position at a 2- to 3-  
131 minute interval, after resting for at least 15 minutes. The average of these two readings was used  
132 for all patients.

133 **Biochemical parameters**

134 Blood samples were drawn after an overnight fast. Serum samples were analyzed for  
135 fasting blood glucose (FBG), TG, total cholesterol (TC), low-density lipoprotein cholesterol  
136 (LDL-C) and high-density lipoprotein cholesterol (HDL-C) using commercially-available kits  
137 (Beckman-Coulter, CITY, STATE, USA). Serum insulin concentration was determined using an  
138 electrochemiluminescence-based assay (Immulite 2000, CITY, STATE, USA). Serum FT<sub>4</sub>, FT<sub>3</sub>,  
139 and TSH levels were also determined by electrochemiluminescence-based immunoassay (Roche  
140 Diagnostics, CITY, Germany).

141 The homeostatic model assessment (HOMA) ratio formula was used to quantify IR  
142 (Mathews et al., 1985).

143 
$$\text{HOMA-IR} = [\text{fasting plasma insulin } (\mu\text{IU/ml}) \times \text{fasting plasma glucose (mmol/l)}] / 22.5$$

144 A HOMA-IR cut-off value chosen was 2.7 (> 2.7 resistant, < 2.7 sensitive).

145 **Diagnosis of metabolic syndrome (MetS)**

146 MetS was diagnosed according to standard protocol (Grundy et al., 2005) based on the  
147 presence of the following criteria: 1) TG  $\geq$  150 mg/dL; 2) LDL-C < 130 mg/dL; 3) HDL-C < 40  
148 mg/dL; 4) TC < 200 mg/dL; 5) FBS  $\geq$  100 mg/dL; 6) SBP  $\geq$  130 mmHg; 7) DBP  $\geq$  85 mmHg; 8)

149 WC > 80 cm; 9) TSH > 2.5 IU/mL. Subjects with levels over the cut-off values were considered  
150 as MetS+ and subjects with levels under the cut-off values were considered to be MetS-.

### 151 **Statistical analysis**

152 All data were analyzed using the Statistical Package for the Social Sciences (SPSS)  
153 software package v25 (IBM, Chicago, IL, USA). Statistical comparisons between the MetS+ and  
154 MetS- groups were achieved with the one-way analysis of variance (ANOVA). Significance  
155 assessments were carried out using Duncan's new multiple range test. Values are expressed as  
156 means and standard deviations. We used hierarchical cluster analysis to assess the relationship  
157 between TSH levels and HOMA-IR values. Each experiment was repeated at least three times. A  
158 *P*-value of less than 0.05 was regarded as statistically significant.

### 159 **Results**

160 Of the 163 individuals considered, 63 were eliminated based on exclusion criteria (Fig.  
161 1). The study population consisted of the remaining 100 obese (BMI > 25 kg/m<sup>2</sup>) women aged  
162 25 to 55 years. Of these, 72 women were diagnosed as MetS+ and the remaining 28 were MetS-.  
163 The anthropometric and biochemical characteristics are presented in Table 1. BMI, SBP, TC,  
164 TG, HDL-C, FBP, TSH, and fasting insulin levels were statistically higher in the MetS+ group  
165 than the MetS- group. Similarly, the values for WC, fat ratio, LDL-C, FT<sub>4</sub>, FT<sub>3</sub>, and HOMA-IR  
166 were higher in the MetS+ group than the MetS- group; however, these differences were not  
167 statistically significant.

168 Based on the Pearson's correlation coefficients (Table 2), TSH positively associated with  
169 WC (*P* = 0.01) and TC (*P* = 0.002) and negatively associated with diastolic blood pressure  
170 (DBP) (*P* = 0.013) and age (*P* = 0.05). TSH also positively associated with insulin (*P* = 0.03) and  
171 HOMA-IR (*P* < 0.01). FT<sub>4</sub> positively associated with TG level (*P* = 0.003) and with HOMA-IR

172 value ( $P = 0.035$ ). FT<sub>3</sub> positively associated with BMI ( $P = 0.032$ ) and WC ( $P = 0.006$ ) and  
173 negatively with age ( $P = 0.004$ ) and TC ( $P = 0.001$ ).

174 The comparison between insulin-sensitive and -resistant women in terms of the clinical  
175 and metabolic characteristics is presented in Figure 2. Using a cut-off value of 2.7 for HOMA-IR  
176 ( $> 2.7$  resistant,  $< 2.7$  sensitive), BMI, WC, TC, TG, LDL-C, FBS, and TSH were higher in the  
177 resistant group than the sensitive one. The positive association between IR and BMI ( $P < 0.001$ )  
178 and WC ( $P < 0.05$ ) was statistically significant. Similarly, TSH was significantly associated with  
179 IR ( $P = 0.03$ ). Higher FT<sub>3</sub> level associated with low levels of insulin sensitivity.

180 Furthermore, hierarchical cluster analysis grouped the clinical and metabolic data according to  
181 HOMA-IR values and revealed statistically significant associations between these groups (Fig.  
182 3).

183

184



186 Table 1. Anthropometric and biochemical characteristics (data are given as a mean and standard  
187 deviation)

| Variables                | MetS+               | MetS-               | <i>P</i> -value |
|--------------------------|---------------------|---------------------|-----------------|
|                          | ( <i>n</i> = 72)    | ( <i>n</i> = 28)    |                 |
|                          | ( <u>mean</u> ± SD) | ( <u>mean</u> ± SD) |                 |
| Age (years)              | 33.12±9.06          | 28.64±8.39          | NS              |
| BMI (kg/m <sup>2</sup> ) | 32.12±4.89          | 29.41±5.98          | < 0.05          |
| WC (cm)                  | 89.38±7.93          | 80.44±2.34          | NS              |
| Fat ratio                | 39.24±6.60          | 24.62±4.35          | NS              |
| SBP (mmHg)               | 132.12±9.48         | 112.10±10.91        | < 0.001         |
| DBP (mmHg)               | 88.34±8.43          | 78.78±4.31          | NS              |
| TC (mg/dl)               | 234.67±9.79         | 193.94±9.75         | < 0.001         |
| TG (mg/dl)               | 167.83±8.90         | 151.41±8.26         | < 0.001         |
| HDL-C (mg/dl)            | 34.27±7.08          | 58.21±4.33          | < 0.05          |
| LDL-C (mg/dl)            | 130.42±11.37        | 125.72±11.45        | NS              |
| FBG (mg/dl)              | 109.55±10.47        | 94.70±8.12          | < 0.001         |
| TSH (mIU/l)              | 2.38±1.52           | 1.38±1.02           | < 0.05          |
| FT <sub>4</sub> (pmol/l) | 11.99±2.81          | 10.56±2.46          | NS              |
| FT <sub>3</sub> (pmol/l) | 6.22±1.70           | 5.47±2.47           | NS              |
| Fasting insulin (μIU/ml) | 12.42±5.09          | 5.10±1.42           | < 0.05          |
| HOMA-IR                  | 5.14±2.13           | 1.61±1.02           | NS              |

188

189 Table 2. Pearson correlation coefficients (r) of TSH, FT<sub>4</sub>, and FT<sub>3</sub> with demographic,  
190 anthropometric, and MetS-associated factors

| Variables                | TSH     | FT <sub>4</sub> | FT <sub>3</sub> |
|--------------------------|---------|-----------------|-----------------|
| Age (years)              | -0.007  | -0.187          | -0.151          |
| BMI (kg/m <sup>2</sup> ) | 0.121   | 0.127           | 0.570           |
| WC (cm)                  | 0.060*  | -0.024          | 0.429           |
| Fat ratio                | 0.084   | 0.091           | 0.351           |
| SBP (mmHg)               | -0.057  | -0.083          | -0.020          |
| DBP (mmHg)               | -0.078* | 0.078           | 0.088           |
| TC (mg/dl)               | 0.015** | -0.007*         | 0.128**         |
| TG (mg/dl)               | 0.238   | 0.126*          | 0.218           |
| HDL-C (mg/dl)            | 0.222   | -0.156          | 0.141           |
| LDL-C (mg/dl)            | -0.029  | -0.084*         | 0.129**         |
| FBG (mg/dl)              | 0.008   | 0.091           | 0.273           |
| Fasting insulin (μIU/ml) | 0.023   | 0.189           | 0.238           |
| HOMA-IR                  | 0.018   | 0.187**         | 0.293           |

191 \*\* Correlation is significant at the *P*-values < 0.001 level (two-tailed)

192 \* Correlation is significant at the *P*-values <0.01 level (two-tailed)

193 NS

## 195 Discussion

196 MetS describes a constellation of different metabolic irregularities, which are often  
197 associated with thyroid hormones and IR. The present study investigated the relationships

198 between thyroid hormones and IR in obese women diagnosed with MetS in Saudi Arabia. It is  
199 common knowledge that excessive weight gain and the resulting obesity increases the likelihood  
200 of incurring MetS. One of the risk factors for IR and hyperlipidemia is hypothyroidism.  
201 Hypothyroidism is associated with weight gain and concomitant changes to the other  
202 components that comprise MetS (Tarcin et al., 2012).

203 The present analysis established that HOMA-IR and TG values are comparatively higher  
204 in women that are MetS+ relative to their MetS- counterparts. Moreover, TSH was found to  
205 positively associate with WC and total cholesterol levels. The finding is in line with previous  
206 studies (Pergola et al., 2007, Ayturk et al., 2009). Increases in TSH concentration, weight, and  
207 TC level are likely indicative of subclinical hypothyroidism. This result serves as evidence for  
208 the association between elevated TSH levels and obesity and MetS. Correlations between  
209 hypothyroidism and IR have been thoroughly established by several earlier studies (Singh et al.,  
210 2010; Pergola et al., 2007; Ravi and Gokaldas, 2015). The analysis described here revealed  
211 positive associations between FT<sub>4</sub> and HOMA-IR values and fasting insulin levels. Low serum  
212 levels of free T<sub>4</sub> were observed in MetS+ women. This strongly suggests that low FT<sub>4</sub> levels  
213 mediate the development of IR. Thus, the association between thyroid hormone and HOMA-IR  
214 cannot be discounted and requires further investigation. In the present study, FT<sub>4</sub> and TG levels  
215 correlated positively, which is in contrast to one described a previous study (Kim et al., 2009).  
216 Furthermore, a positive correlation was observed between FT<sub>4</sub> and MetS-associated variables  
217 (Tarcin et al., 2012). Our results contradict the findings of Ayturk et al. (2009), who did not  
218 detect any correlation between free thyroid hormones and MetS. The increases in TC levels and  
219 LDL-C specifically are indicative of insulin sensitivity.

220 In the present study, increased FT<sub>3</sub> levels positively associated with increases in BMI.  
221 This is in accordance with a previous finding where associations between free or total thyroid  
222 hormone levels and body weight and BMI increases were observed (Roef et al., 2012).  
223 Interestingly, the increase in FT<sub>3</sub> concentration was independent of other metabolic parameters  
224 and insulin sensitivity; these results corroborate the findings of a previous study (Pergola et al.,  
225 2007). FT<sub>3</sub>, alone or in combination with insulin, regulates the uptake and breakdown of glucose  
226 levels. A positive correlation between TG levels and HOMA-IR values was observed in MetS+  
227 subgro

228 up in the present study. Some of the contradictory findings in the present study may stem  
229 from the study design or variations in the health status of the study subjects.

230 The HOMA approach is a reliable, time-tested method for quantifying IR that is both  
231 well established and regarded in the field. The HOMA-based analysis of MetS+ and MetS- obese  
232 women described here provides empirical evidence that BMI positively correlates with IR, which  
233 supports the findings of a previous, independent study (Geloneze et al., 2009). Moreover, the  
234 positive association between HOMA-IR values and elevated TG and total cholesterol levels  
235 nicely reflects its preponderance for MetS. Furthermore, the positive correlation between  
236 HOMA-IR values and TSH levels observed in the present study highlights the role played by the  
237 thyrotropin hormone in adipogenesis. These results are consistent with the findings of Bastemin  
238 et al. (2007) and were further validated using hierarchical clustering.

239

#### 240 **Declaration of interest**

241 The author declares that that is no conflict of interest that may prejudice the impartiality of the  
242 present research.

244 **References**

- 245 Ayturk S, Gursoy A, Kut A, Anil C, Nar A, Tutuncu NB. (2009). Metabolic syndrome and its  
246 components are associated with increased thyroid volume and nodule prevalence in a  
247 mild-to-moderate iodine-deficient area. *European Journal of Endocrinology*, 161, 599-  
248 605.
- 249 Bastemir M, Akin F, Alkis E, Kaptanoglu B. (2007). Obesity is associated with increased serum  
250 TSH level, independent of thyroid function. *Swiss Medical Weekly*, 137, 431-4.
- 251 Chakrabarti S, Guria S, Samanta I, Das M. (2007). Thyroid dysfunction modulates  
252 glucoregulatory mechanism in rat. *Indian Journal of experimental Biology*. 45, 549-553.
- 253 Danaei G, Lu Y, Singh GM, Carnahan E, Stevens GA, Cowan MJ, Farzadfar F, Lin JK, Finucane  
254 MM, Rao M, Khang YH et al. (2014). Cardiovascular disease, chronic kidney disease,  
255 and diabetes mortality burden of cardio metabolic risk factors from 1980 to 2010: a  
256 comparative risk assessment. *Lancet Diabetes and Endocrinology*, 2,634-47.
- 257 Farasat T, Cheema AM, Khan MN. (2011). Relationship of thyroid hormones with serum fasting  
258 insulin and insulin resistance in euthyroid glycemic anomalies. *Pakistan Journal of*  
259 *Zoology*. 43, 379-386.
- 260 Ferrannini E. (2004). Hyperinsulinemia and insulin resistance. In: *Diabetes: A fundamental and*  
261 *clinical text*, 3rd edn. (eds. D. Le Roith, S.I. Taylor and J.M. Olefsky).
- 262 Ford ES. (2005). Risks for all-cause mortality, cardiovascular disease, and diabetes associated  
263 with the metabolic syndrome. *Diabetes Care*, 28, 1769-78.
- 264 Geloneze B, Vasques ACJ, Stabe CFC, Pareja JC, Rosado LEFPL, Queiroz ECD, Tambascia  
265 MA. (2009). HOMA1-IR and HOMA2-IR indexes in identifying insulin resistance and

266 metabolic syndrome-Brazilian metabolic syndrome study (BRAMS). *Arquivos*  
267 *Brasileiros de Endocrinologia & Metabologia*, 53, 281-287.

268 Gharib H, Tuttle RM, Baskin HJ, Fish LH, Singer PA, McDermott MT. (2004). Subclinical  
269 thyroid dysfunction: a joint statement on management from the American Association of  
270 Clinical Endocrinologists, the American Thyroid Association, and the Endocrine Society.  
271 *Endocrine Practice*, 10, 497–501.

272 Grundy SM, Cleeman JI, Daniels SR, Donato KA, Eckel RH, Franklin BA, Gordon DJ, Krauss  
273 RM, Savage PJ, Smith SC Jr, Spertus JA, Costa American Heart Association, F. &  
274 National Heart, Lung, and Blood Institute. (2005) Diagnosis and management of the  
275 metabolic syndrome: an American Heart Association/National Heart, Lung, and Blood  
276 Institute Scientific Statement. *Circulation*, 112, 2735–2752.

277 Harris MI, Flegal KM, Cowie CC, Eberhard MS, Goldstem DE, Little RR, Wiedmeyer HM,  
278 Byrd-Holt DD, (1998). Prevalence of diabetes, impaired fasting glucose, and impaired  
279 glucose tolerance in U.S. adults. The 3rd National Health and Nutrition Examination  
280 Survey, 1988-1994. *Diabetes Care*, 4, 518-524.

281 Hoogwerf BJ, Nutall FQ. (1984). Long-term weight regulation in treated hyperthyroid and  
282 hypothyroid subjects. *American Journal of Medicine*, 76, 963–970.

283 Kim BJ, Kim TY, Koh JM, Kimt HK, Park JY, Lee KU, Shong YK, Kim WB. (2009).  
284 Relationship between serum free T4 (FT4) levels and metabolic syndrome (MS) and its  
285 components in healthy euthyroid subjects. *Clinical Endocrinology*, 70, 152-160.

286 Klieverik LP, Janssen SF, Van Riel A., Foppen E, Bisschop PH, Serlie MJ, Boelen A,  
287 Ackermans MT, Sauerwein HP, Fliers E, Kalsbeek A.(2009). Thyroid hormone  
288 modulates glucose production via a sympathetic pathway from the hypothalamic

289           paraventricular nucleus to the liver. Proceeding of National Academy of Sciences, 106,  
290           5966-5971.

291 Knudsen N, Laur Berg P, Rasmussen LB, Bulow L, Ovesen L, Jorgensen T. (2005). Small  
292           differences in thyroid function may be important for body mass index and the occurrence  
293           of obesity in the population,” Journal of Clinical Endocrinology and Metabolism, 90,  
294           4019–4024.

295 Lacobellis G, Ribaud MC, Zappaterreno A, Lannucci, CV, and Leonetti F. (2005.) Relationship  
296           of thyroid function with body mass index, leptin, insulin sensitivity and adiponectin in  
297           euthyroid obese women. Clinical Endocrinology. 62, 487-491.

298 Matthews DR, Hosker JP, Rudenski AS, Naylor BA, Treaher DF, Turner RC. (1985).  
299           Homeostasis model assessment: insulin resistance and beta-cell function from fasting  
300           plasma glucose and insulin concentrations in man. Diabetologia, 28, 412-9.

301 Naslund E, Andersson I, Degerblad M, Kogner P, Kral JG, Rossner S, Hellstrom PM. (2000).  
302           Associations of leptin, insulin resistance and thyroid function with long-term weight loss  
303           in dieting obese men. Journal of internal Medicine, 248, 299-308.

304 Pergola GD, Ciampolillo A, Paolotti S, Trerotolit P, Giorgino R. (2007). Free triiodothyronine  
305           and thyroid-stimulating hormone are directly associated with waist circumference,  
306           independently of insulin resistance, metabolic parameters and blood pressure in  
307           overweight and obese women. Clinical Endocrinology, 67, 265-269.

308 Ravi BV, Gokaldas SR. (2015). A Study on Assessment of Thyroid Stimulating Hormone and  
309           Insulin Resistance in Women with Polycystic Ovarian Syndrome. International Journal of  
310           Science and Research, 4, 1683-1686.

- 311 Roef G, Lapauw B, Goemaere S, Zmierzak HG, Tuye K, Kaufman JM. (2012). Body  
312 composition and metabolic parameters are associated with variation in thyroid hormone  
313 levels among euthyroid young men. *European Journal of Endocrinology*, 16, 719-726.
- 314 Singh BM, Goswami B, Mallika V. (2010). Association between insulin resistance and  
315 hypothyroidism in females attending a tertiary care hospital. *Indian Journal of Clinical  
316 Biochemistry*, 25(2), 141-145.
- 317 Tarcin O, Abanonu GB, Yazici D, Tarcin O. (2012). Association of metabolic syndrome  
318 parameters with TT3 and FT3/FT4 ratio in obese Turkish population. *Metabolic  
319 Syndrome and Related Disorders*, 10(2), 137-142.
- 320 Topsakal S, Yerlikaya E, Akin F, Kaptanoglu B, Erürker T. (2012). Relation with HOMA-IR and  
321 thyroid hormones in obese Turkish women with metabolic syndrome. *Eating and weight  
322 disorder*, 17, e57-61.

### 323 **Figures legends**

324 **Figure 1.** Flowchart schematic of study subject selection using the inclusion and exclusion  
325 criteria

326 **Figure 2.** Comparison of clinical and metabolic characteristics according to HOMA-IR. Insulin-  
327 sensitive (green, n = 21) and insulin-resistant (blue, n = 51) obese women. \* $P < 0.05$ , \*\* $P <$   
328  $0.001$ . BMI = body mass index, WC = waist circumference, SBP = systolic blood pressure, DBP  
329 = diastolic blood pressure, TC = total cholesterol, HDL-C = high-density lipoprotein cholesterol,  
330 LDL-C = low-density lipoprotein cholesterol, FBG = fasting blood glucose, TSH = thyroid-  
331 stimulating hormone, FT<sub>4</sub> = free thyroxine, FT<sub>3</sub> = free triiodothyronine.

332 **Figure 3.** Hierarchical cluster analysis showing a significant correlation between HOMA-IR  
333 values and clinical and metabolic characteristics between both groups.



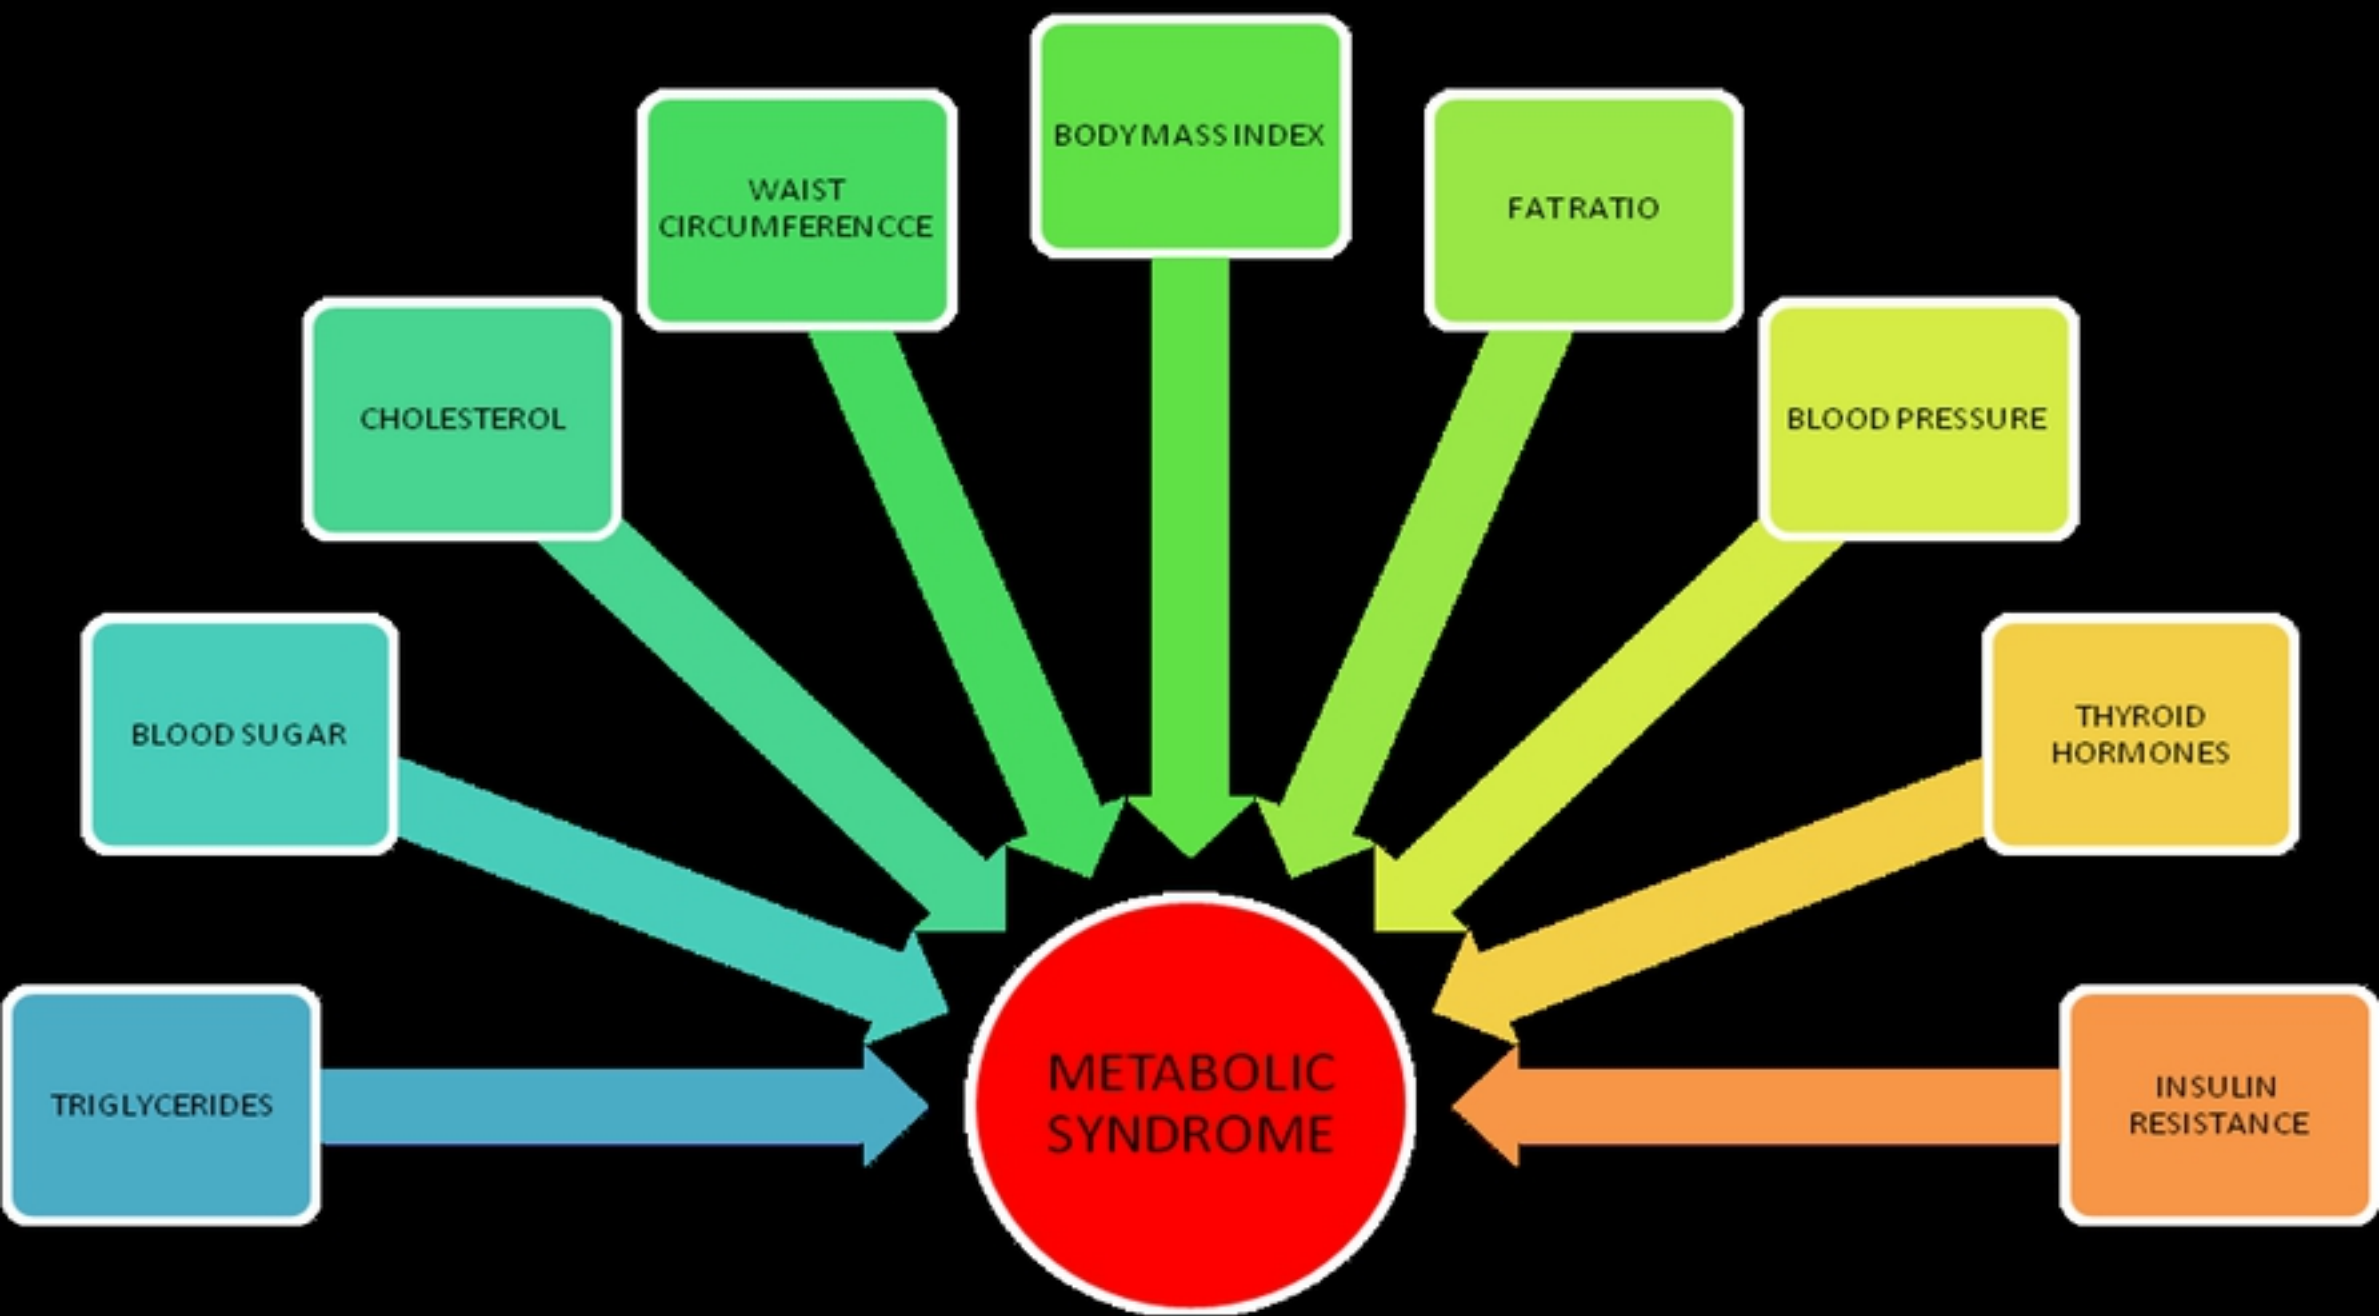

graphical abstract

### HOMA-IR

■ Sensitive ■ Resistant

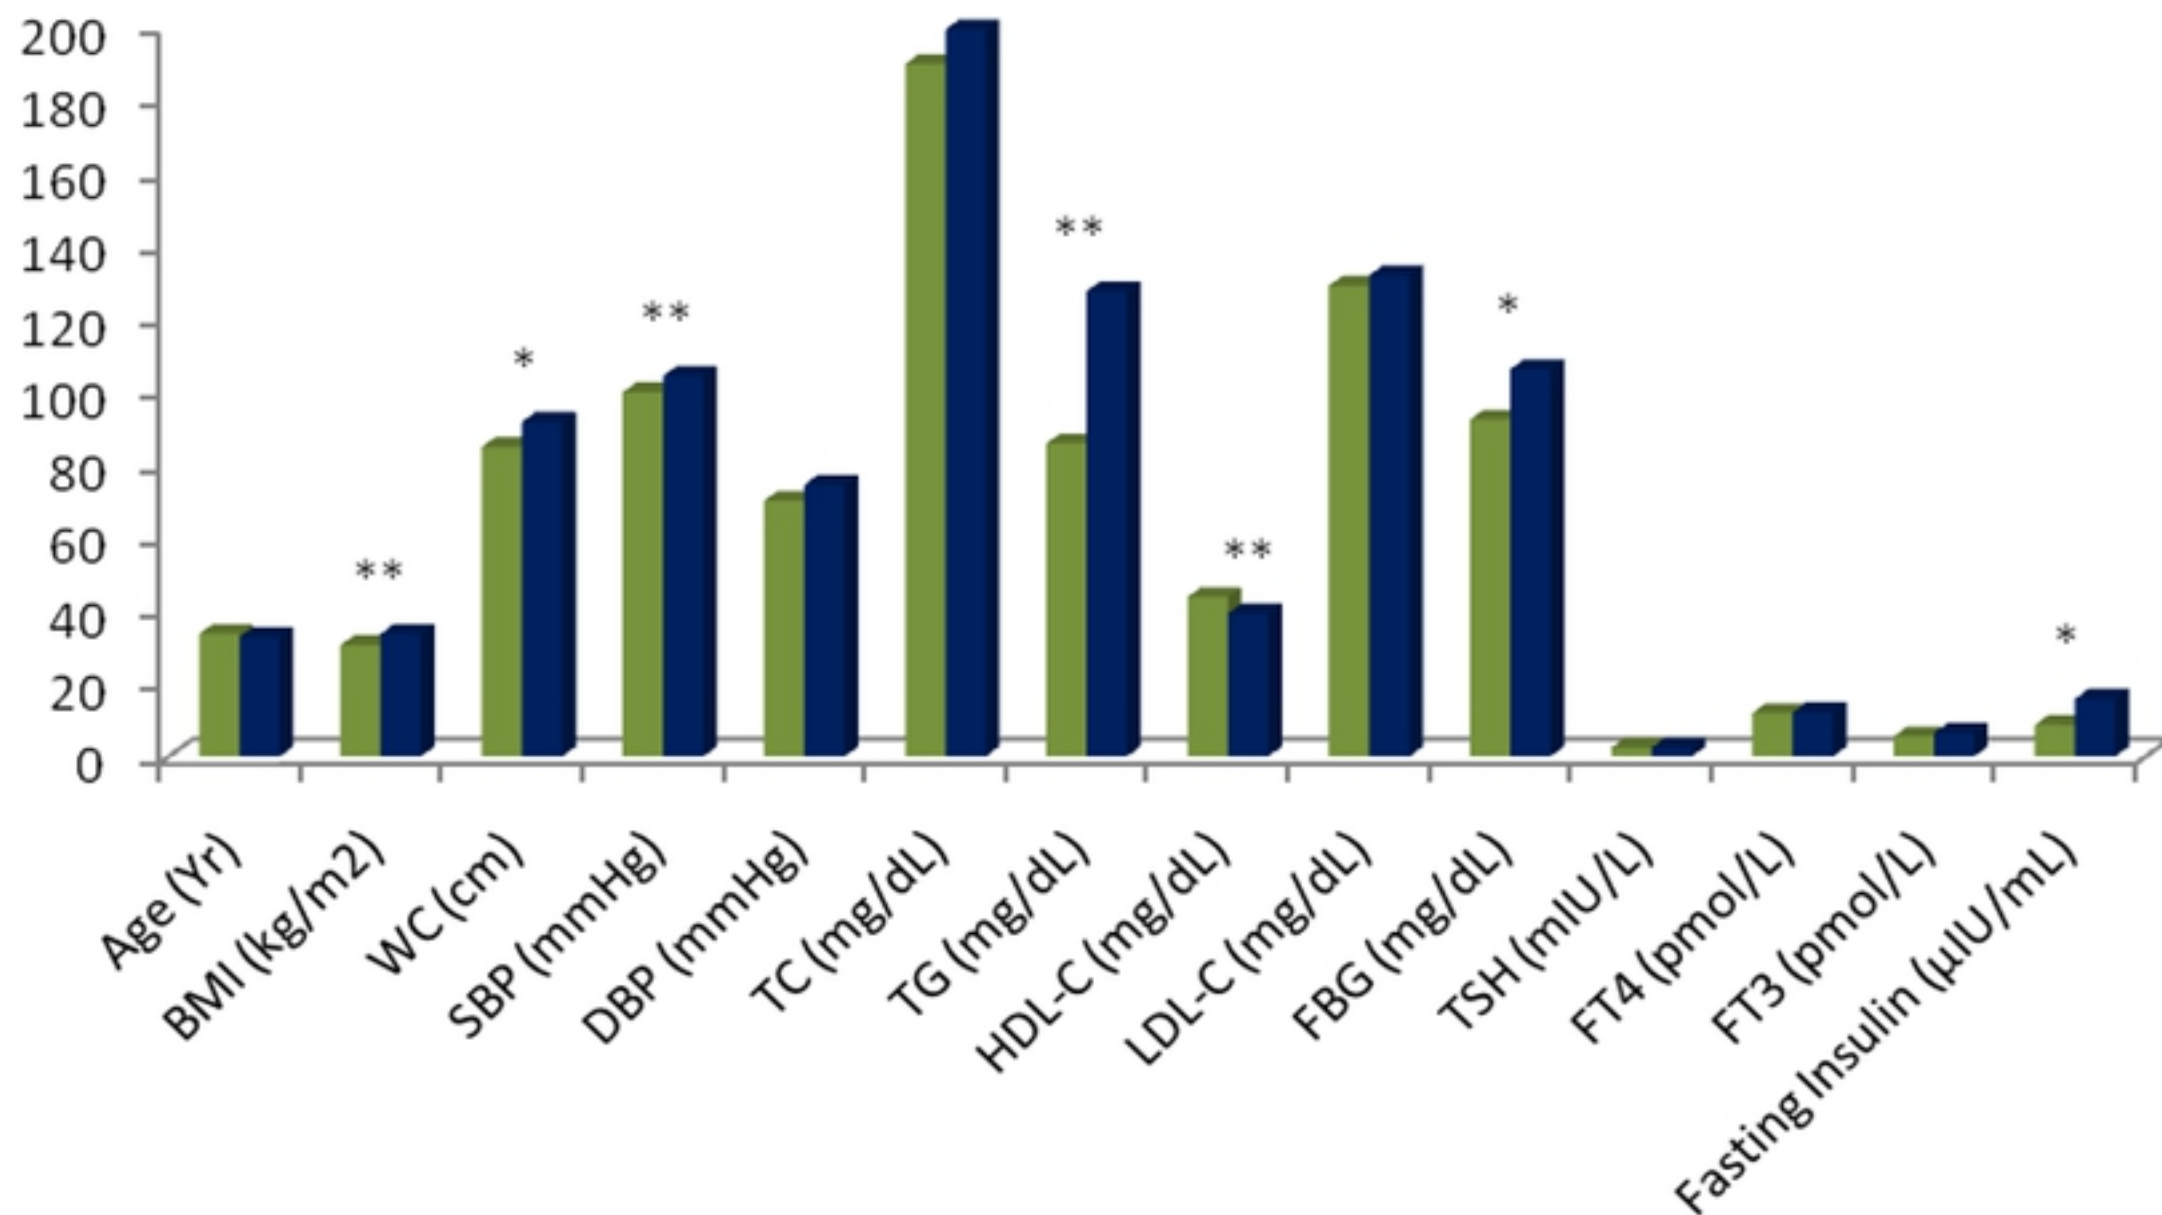

Comparison of clinical and metabolic characteristics according to

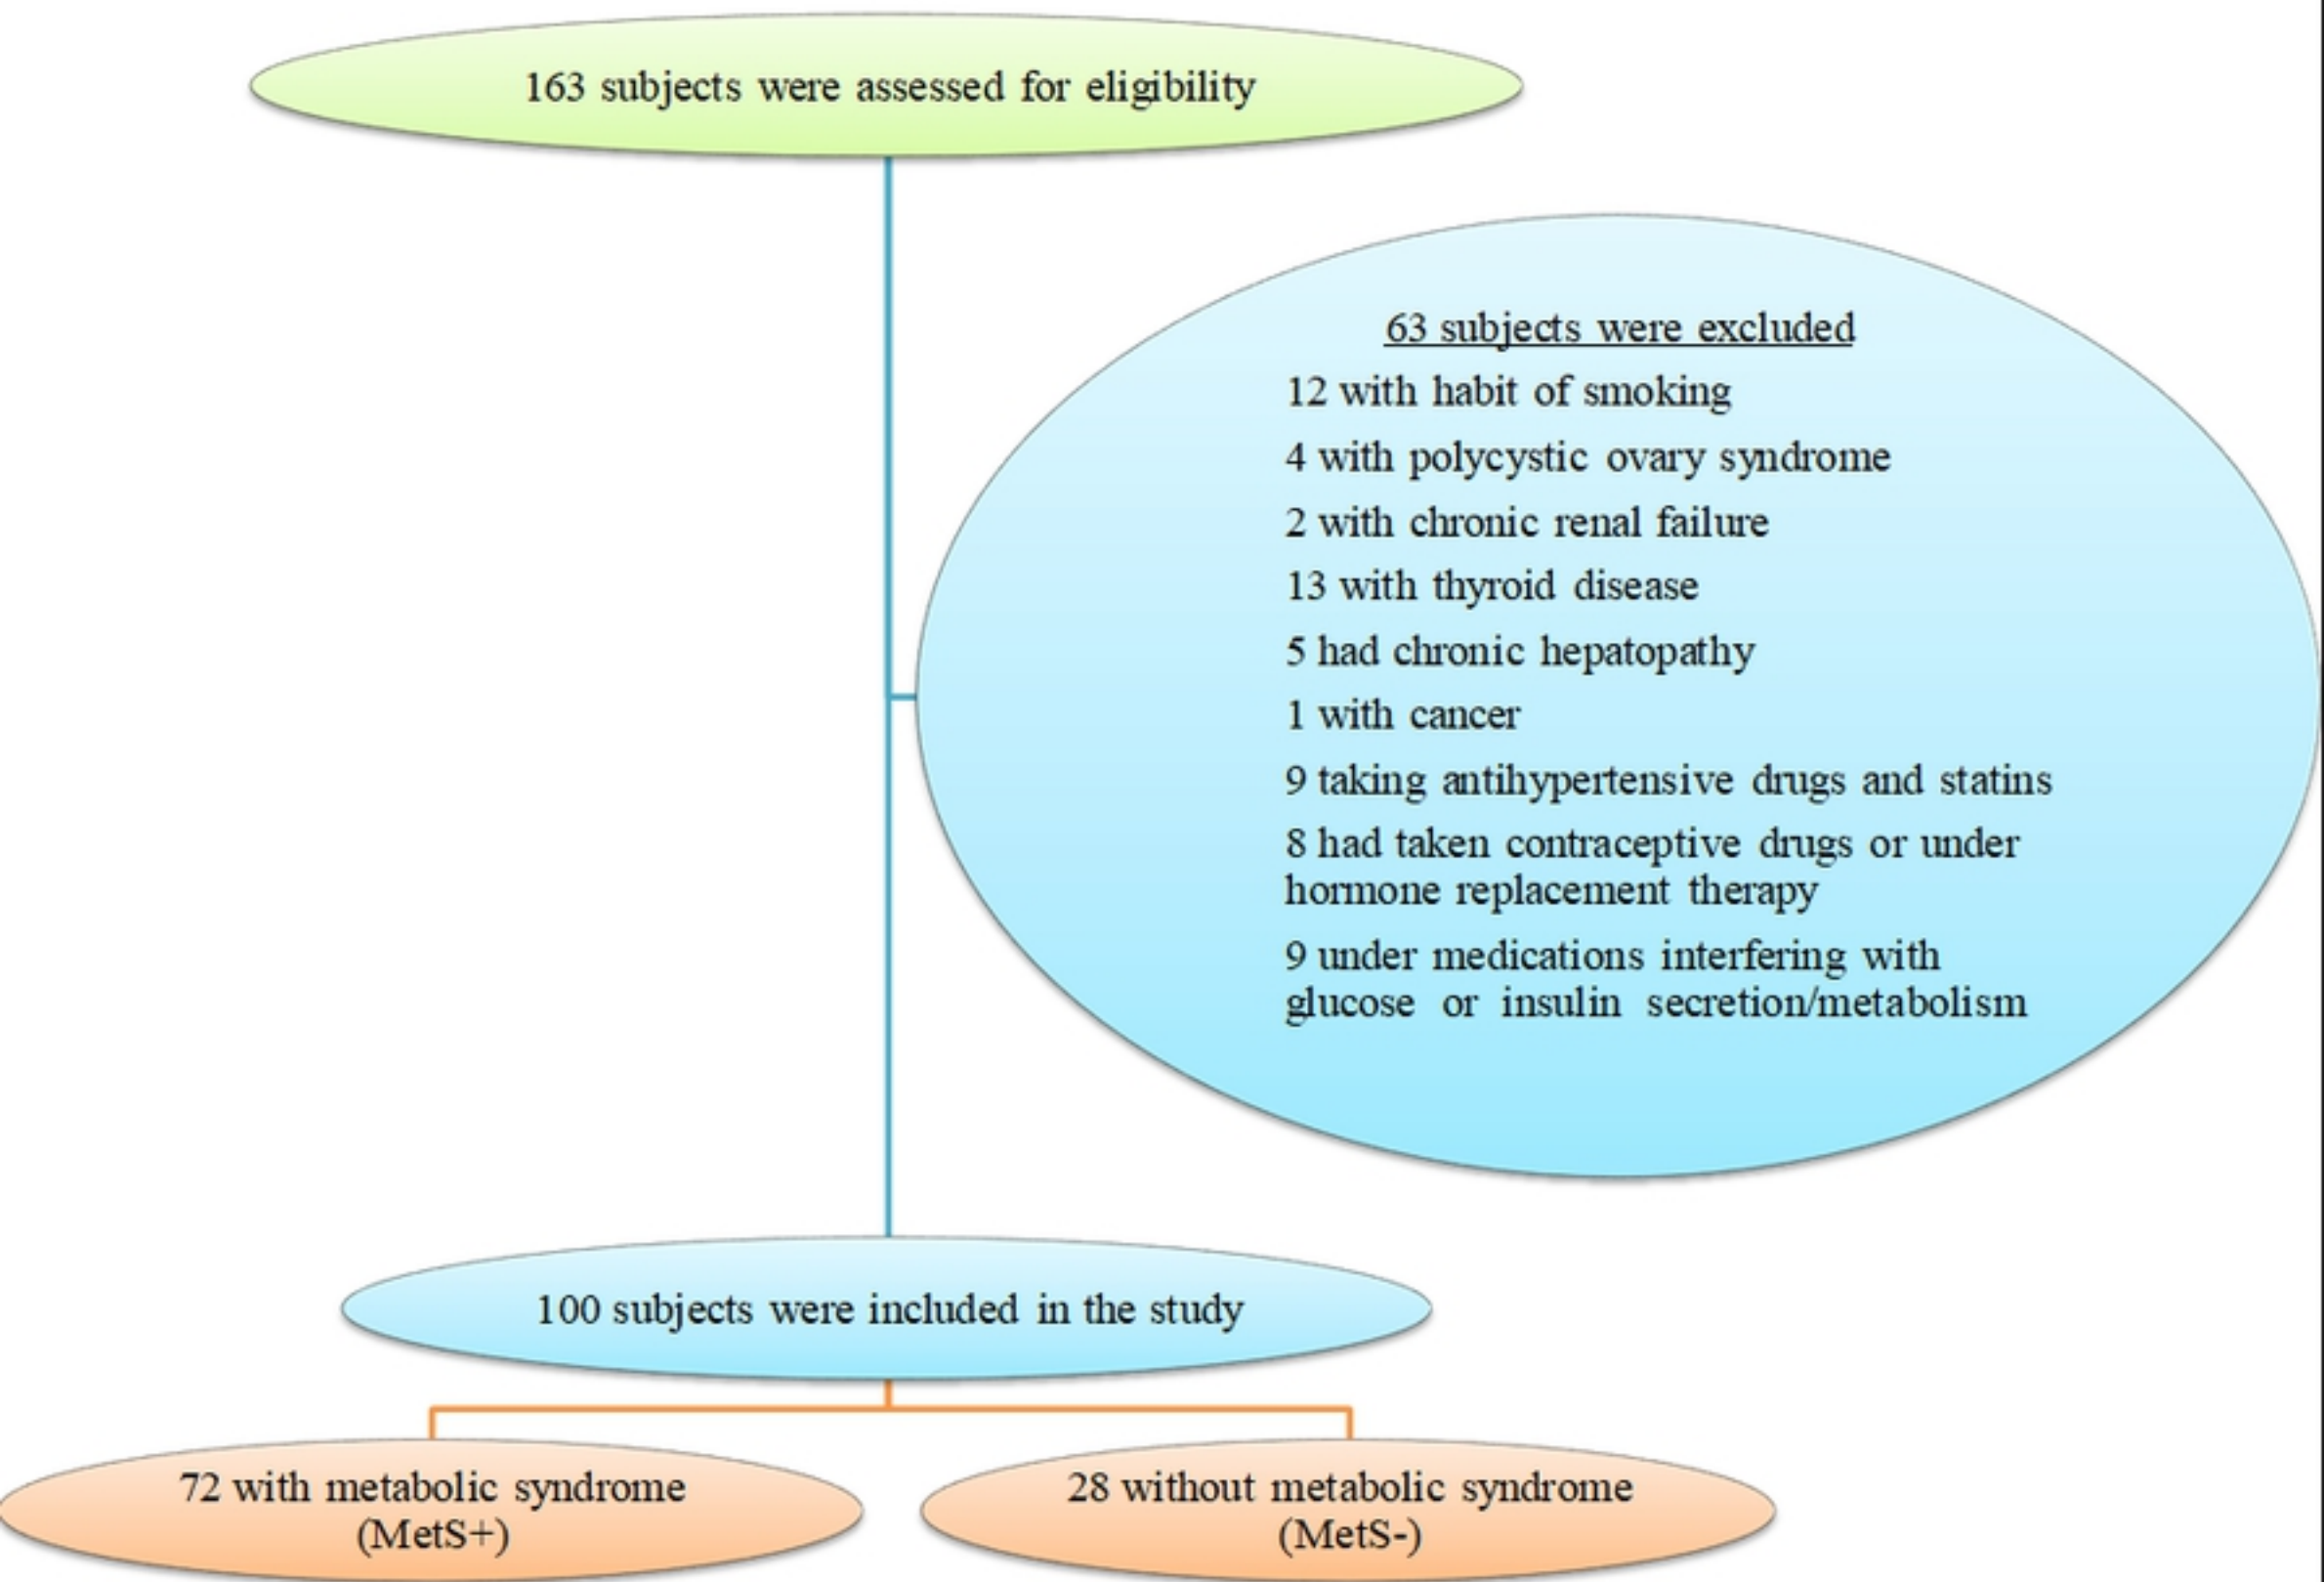

Flowchart showing study subjects with inclusion and exclusion criteria

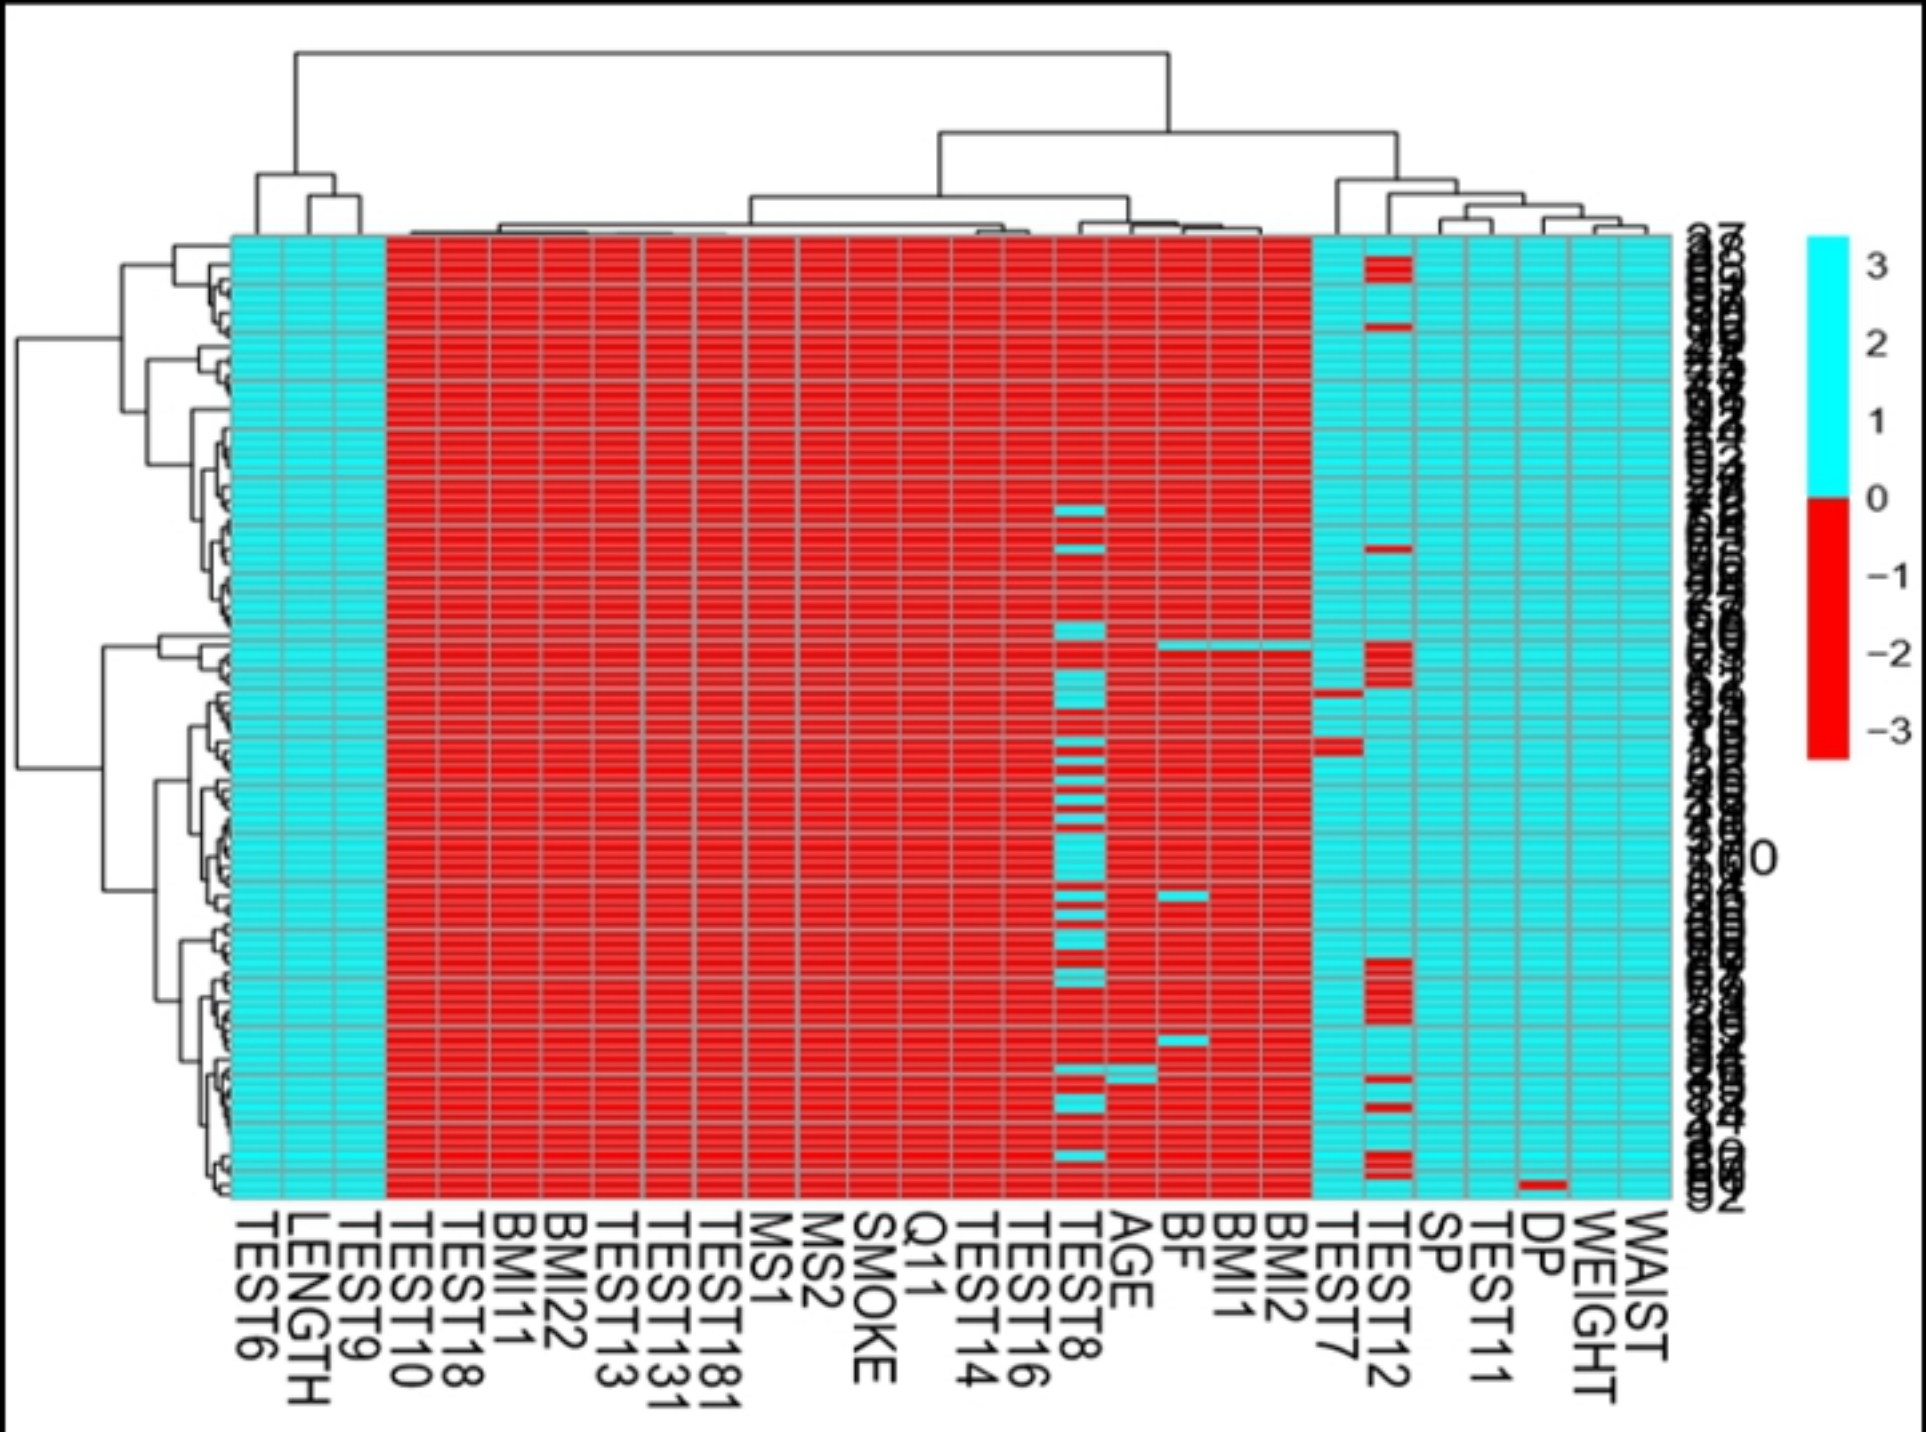

Fig.3 Shows a significant correlation among clinical a

Table 1. Anthropometric and biochemical variables in the study subjects (data are given as mean and standard deviation)

| Variables                            | MetS+<br>(n=72) | MetS-<br>(n=28) | P-value |
|--------------------------------------|-----------------|-----------------|---------|
| Age (years)                          | 33.12±9.06      | 28.64±8.39      | NS      |
| Body mass index (kg/m <sup>2</sup> ) | 32.12±4.89      | 29.41±5.98      | <0.05   |
| Waist circumference (cm)             | 89.38±7.93      | 80.44±2.34      | NS      |
| Fat ratio                            | 39.24±6.60      | 24.62±4.35      | NS      |
| Systolic blood pressure (mmHg)       | 132.12±9.48     | 112.10±10.91    | <0.001  |
| Diastolic blood pressure (mmHg)      | 88.34±8.43      | 78.78±4.31      | NS      |
| Total cholesterol (mg/dl)            | 234.67±9.79     | 193.94±9.75     | <0.001  |
| Triglyceride (mg/dl)                 | 167.83±8.90     | 151.41±8.26     | <0.001  |
| HDL-C (mg/dl)                        | 34.27±7.08      | 58.21±4.33      | <0.05   |
| LDL-C (mg/dl)                        | 130.42±11.37    | 125.72±11.45    | NS      |
| Fasting blood glucose (mg/dl)        | 109.55±10.47    | 94.70±8.12      | <0.001  |
| TSH (mIU/l)                          | 2.38±1.52       | 1.38±1.02       | <0.05   |
| FT <sub>4</sub> (pmol/l)             | 11.96±2.81      | 10.56±2.46      | NS      |
| FT <sub>3</sub> (pmol/l)             | 6.22±1.70       | 5.47±2.47       | NS      |
| Fasting Insulin (μIU/ml)             | 12.42±5.09      | 5.10±1.42       | <0.05   |
| HOMA-IR                              | 5.14±2.13       | 1.61±1.02       | NS      |

bioRxiv preprint doi: <https://doi.org/10.1101/595884>; this version posted April 1, 2019. The copyright holder for this preprint (which was not certified by peer review) is the author/funder, who has granted bioRxiv a license to display the preprint in perpetuity. It is made available under aCC-BY 4.0 International license.

Table 2. Pearson correlation coefficients (r) of TSH, FT<sub>4</sub> and FT<sub>3</sub> with general, anthropometric and components of metabolic syndrome

| Variables                            | TSH     | FT <sub>4</sub> | FT <sub>3</sub> |
|--------------------------------------|---------|-----------------|-----------------|
| Age (years)                          | -0.007  | -0.187          | -0.151          |
| Body mass index (kg/m <sup>2</sup> ) | 0.121   | 0.127           | 0.570           |
| Waist circumference (cm)             | 0.060*  | -0.024          | 0.429           |
| Fat ratio                            | 0.084   | 0.091           | 0.351           |
| Systolic blood pressure (mmHg)       | -0.057  | -0.083          | -0.020          |
| Diastolic blood pressure (mmHg)      | -0.078* | 0.078           | 0.088           |
| Total cholesterol (mg/dl)            | 0.015** | -0.007*         | 0.128**         |
| Triglyceride (mg/dl)                 | 0.238   | 0.126*          | 0.218           |
| HDL-C (mg/dl)                        | 0.222   | -0.156          | 0.141           |
| LDL-C (mg/dl)                        | -0.029  | -0.084*         | 0.129**         |
| Fasting blood glucose (mg/dl)        | 0.008   | 0.091           | 0.273           |
| Fasting Insulin (μIU/ml)             | 0.023   | 0.189           | 0.238           |
| HOMA-IR                              | 0.018   | 0.187**         | 0.293           |

\*\* Correlation is significant at the 0.001 level (2-tailed).  
\* Correlation is significant at the 0.05 level (2-tailed).
